# Supplementary material for: Association between the expression difference of cortisol in umbilical cord blood and discordant growth in dichorionic twins: a cross-sectional survey
Source: PeerJ. 2025 Jun 4;13:e19479. doi: 10.7717/peerj.19479 (PMC12145084; doi:10.7717/peerj.19479)
Supplement: Supplemental Information 1 [file peerj-13-19479-s001.xlsx]

## Sheet: Discordant Twins（DT group）
Discordant Twins（DT group）
NO.	Birth weight(g)		Cortisol（nmol）
	Smaller neonates	Larger neonates	Smaller neonates	Larger neonates
1	1550	1950	109	89.5
2	2120	2657	160	109
3	1980	2497	138	94
4	1598	2070	141	102
5	1930	2428	213	88.3
6	1918	2430	189	110
7	1930	2445	254	97
8	2020	2528	247	111
9	1857	2355	223	109
10	2006	2523	250	92
11	1978	2480	256	97
12	1915	2435	244	99
13	2066	2590	198	92
14	1992	2498	238	105
15	1825	2313	220	97
16	1886	2360	239	102
17	1910	2398	250	95
18	1899	2413	227	100.5
19	2012	2553	249	103
20	1896	2388	254	93
21	1958	2459	256	94
22	1898	2413	228	96
23	1953	2468	240	99
24	1989	2492	233	82
25	1893	2430	238	94
26	1994	2531	229	89
27	2011	2532	250	92
28	1896	2393	245	98
29	2005	2534	237	93
30	1918	2435	243	98
31	1899	2386	180	105
32	1920	2437	144	103
33	1762	2238	80.8	73.9
34	1856	2327	246	113
35	1902	2385	239	98
36	1928	2439	259	99
37	1830	2292	260	130
38	1858	2413	248	120
39	1989	2544	107	94
40	1990	2567	198	102
41	1979	2498	201	115
42	1865	2350	198	95
43	1889	2434	199	113
44	1790	2298	220	82
45	1967	2478	187	108
46	1997	2555	244	102
47	1866	2388	209	96

## Sheet: Concordant Twins（CT group）
Concordant Twins（CT group）
NO.	Birth weight(g)		Cortisol（nmol）
	Twin A	Twin B	Twin A	Twin B
1	2150	2380	110	94.1
2	2620	2700	102	104
3	2340	2460	102	121
4	2450	2400	74.2	73.9
5	2300	2330	107	107
6	2740	2870	80.6	77.3
7	2560	2580	100	97.3
8	2300	2420	99	102
9	2390	2410	98	100
10	2230	2350	101	98.3
11	2399	2500	102	109
12	2298	2420	102	103
13	2330	2350	106	102
14	2310	2433	105	103
15	2360	2480	112	108
16	2333	2450	106	102
17	2390	2370	105	106
18	2431	2460	97	95
19	2320	2510	103	102
20	2410	2470	110	106
21	2390	2370	105	107
22	2450	2430	102	105
23	2340	2520	98	99
24	2400	2580	103	102
25	2330	2310	110	106
26	2290	2460	110	108
27	2380	2400	99	100
28	2430	2458	113	88
29	2443	2567	119	89
30	2389	2487	78.5	95
31	2378	2511	108	92.5
32	2318	2580	112	93
33	2458	2460	106	98
34	2540	2410	117	106
35	2360	2610	99	107
36	2540	2598	126	105
37	2371	2017	110	123
38	2534	2460	89.4	73.2
39	2398	2474	104	89.4
40	2378	2398	99.4	118
41	2341	2512	79.5	93.4
42	2447	2417	88.5	101.3
43	2358	2460	96.4	115
44	2470	2201	83.7	97.1
45	2469	2381	98.5	115
46	2419	2389	98.9	94
47	2567	2470	99	96
48	2412	2360	93	99
49	2440	2432	97	90
50	2470	2365	96	89
51	2430	2540	93.5	94
52	2376	2466	90	98
53	2576	2654	97	95
54	2517	2434	93	92
55	2390	2365	102	89
56	2211	2411	96	88
57	2406	2216	105	98
58	2203	2309	99	80
59	2425	2276	102	89
60	2498	2488	99	102
61	2190	2399	103	90
